# Supplementary material for: Svalbamides A and B, Pyrrolidinone-Bearing Lipodipeptides from Arctic Paenibacillus sp.
Source: MDPI journal article supplement (doi:10.3390/md19040229), 2021-04-17
Supplement: s1 [file s1]

## ***Supplementary Material***

# **Svalbamides A and B, Pyrrolidinone-Bearing Lipodipeptides from Arctic *Paenibacillus* sp.**

Young Eun Du<sup>1</sup>, Eun Seo Bae<sup>1</sup>, Yeonjung Lim<sup>2</sup>, Jang-Cheon Cho<sup>2</sup>, Sang-Jip Nam<sup>3</sup>, Jongheon Shin<sup>1</sup>, Sang Kook Lee<sup>1</sup>, Seung-Il Nam<sup>4</sup> and Dong-Chan Oh<sup>1,\*</sup>

<sup>1</sup> Natural Products Research Institute, College of Pharmacy, Seoul National University, Seoul 08826, Republic of Korea

<sup>2</sup> Department of Biological Sciences, Inha University, Incheon 22212, Republic of Korea

<sup>3</sup> Department of Chemistry and Nanoscience Ewha Womans University, Seoul 03760, Republic of Korea

<sup>4</sup> Korea Polar Research Institute, Incheon 21990, Republic of Korea

# Table of Contents

|                                                                                                                                                                                                                                                                                                             |            |
|-------------------------------------------------------------------------------------------------------------------------------------------------------------------------------------------------------------------------------------------------------------------------------------------------------------|------------|
| <b>Figure S1.</b> $^1\text{H}$ NMR spectrum (800 MHz) of svalbamide A ( <b>1</b> ) in DMSO- $d_6$ . ....                                                                                                                                                                                                    | <b>S3</b>  |
| <b>Figure S2.</b> $^{13}\text{C}$ NMR spectrum (200 MHz) of svalbamide A ( <b>1</b> ) in DMSO- $d_6$ . ....                                                                                                                                                                                                 | <b>S4</b>  |
| <b>Figure S3.</b> COSY NMR spectrum (800 MHz) of svalbamide A ( <b>1</b> ) in DMSO- $d_6$ . ...                                                                                                                                                                                                             | <b>S5</b>  |
| <b>Figure S4.</b> HSQC NMR spectrum (800 MHz) of svalbamide A ( <b>1</b> ) in DMSO- $d_6$ . ...                                                                                                                                                                                                             | <b>S5</b>  |
| <b>Figure S5.</b> HMBC NMR spectrum (800 MHz) of svalbamide A ( <b>1</b> ) in DMSO- $d_6$ . ...                                                                                                                                                                                                             | <b>S6</b>  |
| <b>Figure S6.</b> TOCSY NMR spectrum (800 MHz) of svalbamide A ( <b>1</b> ) in DMSO- $d_6$ . .                                                                                                                                                                                                              | <b>S6</b>  |
| <b>Figure S7.</b> $^1\text{H}$ NMR spectrum (800 MHz) of svalbamide B ( <b>2</b> ) in DMSO- $d_6$ . ....                                                                                                                                                                                                    | <b>S7</b>  |
| <b>Figure S8.</b> $^{13}\text{C}$ NMR spectrum (200 MHz) of svalbamide B ( <b>2</b> ) in DMSO- $d_6$ . ....                                                                                                                                                                                                 | <b>S8</b>  |
| <b>Figure S9.</b> COSY NMR spectrum (800 MHz) of svalbamide B ( <b>2</b> ) in DMSO- $d_6$ . ...                                                                                                                                                                                                             | <b>S9</b>  |
| <b>Figure S10.</b> HSQC NMR spectrum (800 MHz) of svalbamide B ( <b>2</b> ) in DMSO- $d_6$ . .                                                                                                                                                                                                              | <b>S9</b>  |
| <b>Figure S11.</b> HMBC NMR spectrum (800 MHz) of svalbamide B ( <b>2</b> ) in DMSO- $d_6$ . ...                                                                                                                                                                                                            | <b>S10</b> |
| <b>Figure S12.</b> TOCSY NMR spectrum (800 MHz) of svalbamide B ( <b>2</b> ) in DMSO- $d_6$ . ...                                                                                                                                                                                                           | <b>S10</b> |
| <b>Table S1.</b> LC/MS analysis of D- and L-FDAA derivatives of the amino acid-derived units in svalbamide A ( <b>1</b> ), svalbamide B ( <b>2</b> ), L-2,4-diamino butanoic acid ( <b>3</b> ), D-valine ( <b>4</b> ), and L-valine ( <b>5</b> ) authentic samples. Retention times (min) are notified..... | <b>S11</b> |
| <b>Figure S13.</b> The simulated models of four possible diastereomers ( <b>a–d</b> ) of svalbamide A ( <b>1</b> ) and the result of DP4 calculation. ....                                                                                                                                                  | <b>S12</b> |
| <b>Table S2.</b> The major conformers of diastereomers ( <b>a–d</b> ) of svalbamide A ( <b>1</b> ), identified by conformational searches in MMFF94 force field using MacroModel. ...                                                                                                                       | <b>S13</b> |
| <b>Table S3.</b> Experimental (Exp.) and calculated (Cal.) chemical shift values (CS, $\delta$ ) of diastereomers ( <b>a–d</b> ) of <b>1</b> and svalbamide A ( <b>1</b> ). ....                                                                                                                            | <b>S17</b> |

**Figure S1.**  $^1\text{H}$  NMR spectrum (800 MHz) of svalbamide A (**1**) in  $\text{DMSO-}d_6$ .

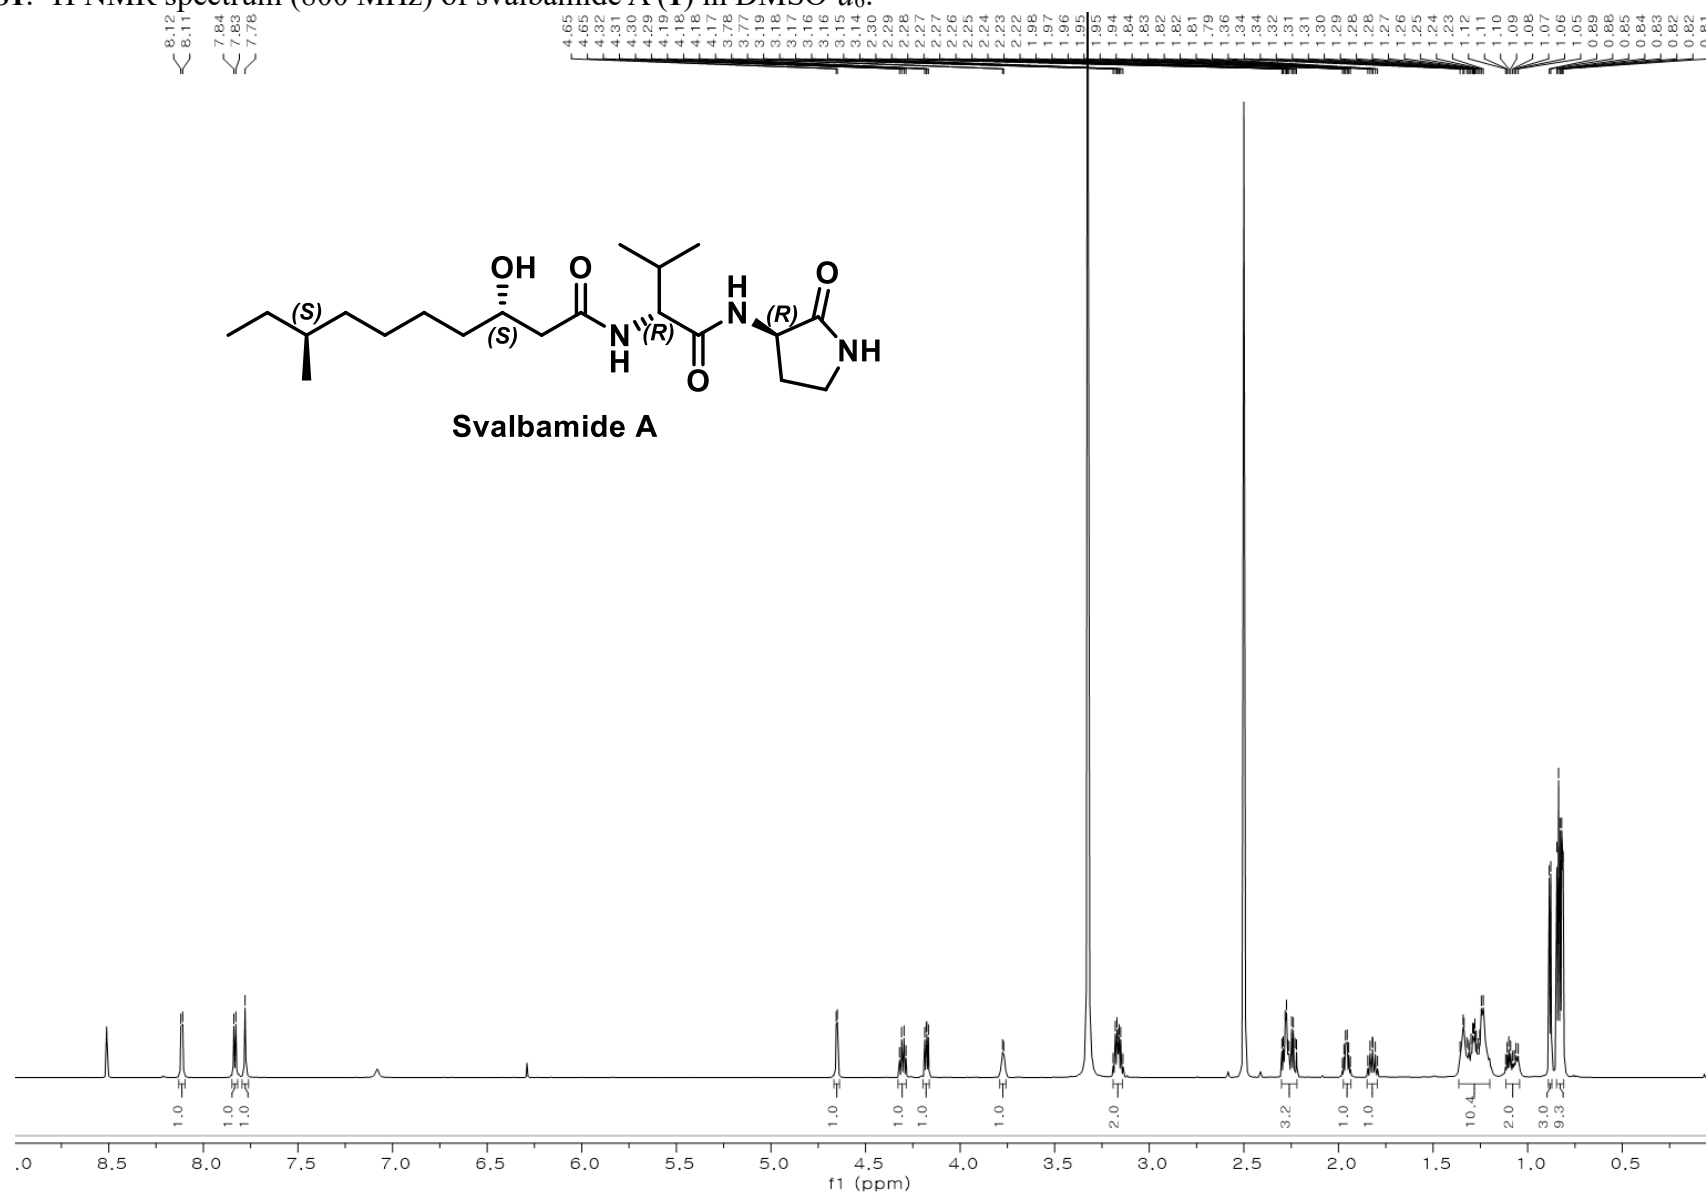

**Figure S2.**  $^{13}\text{C}$  NMR spectrum (200 MHz) of svalbamide A (**1**) in  $\text{DMSO}-d_6$ .

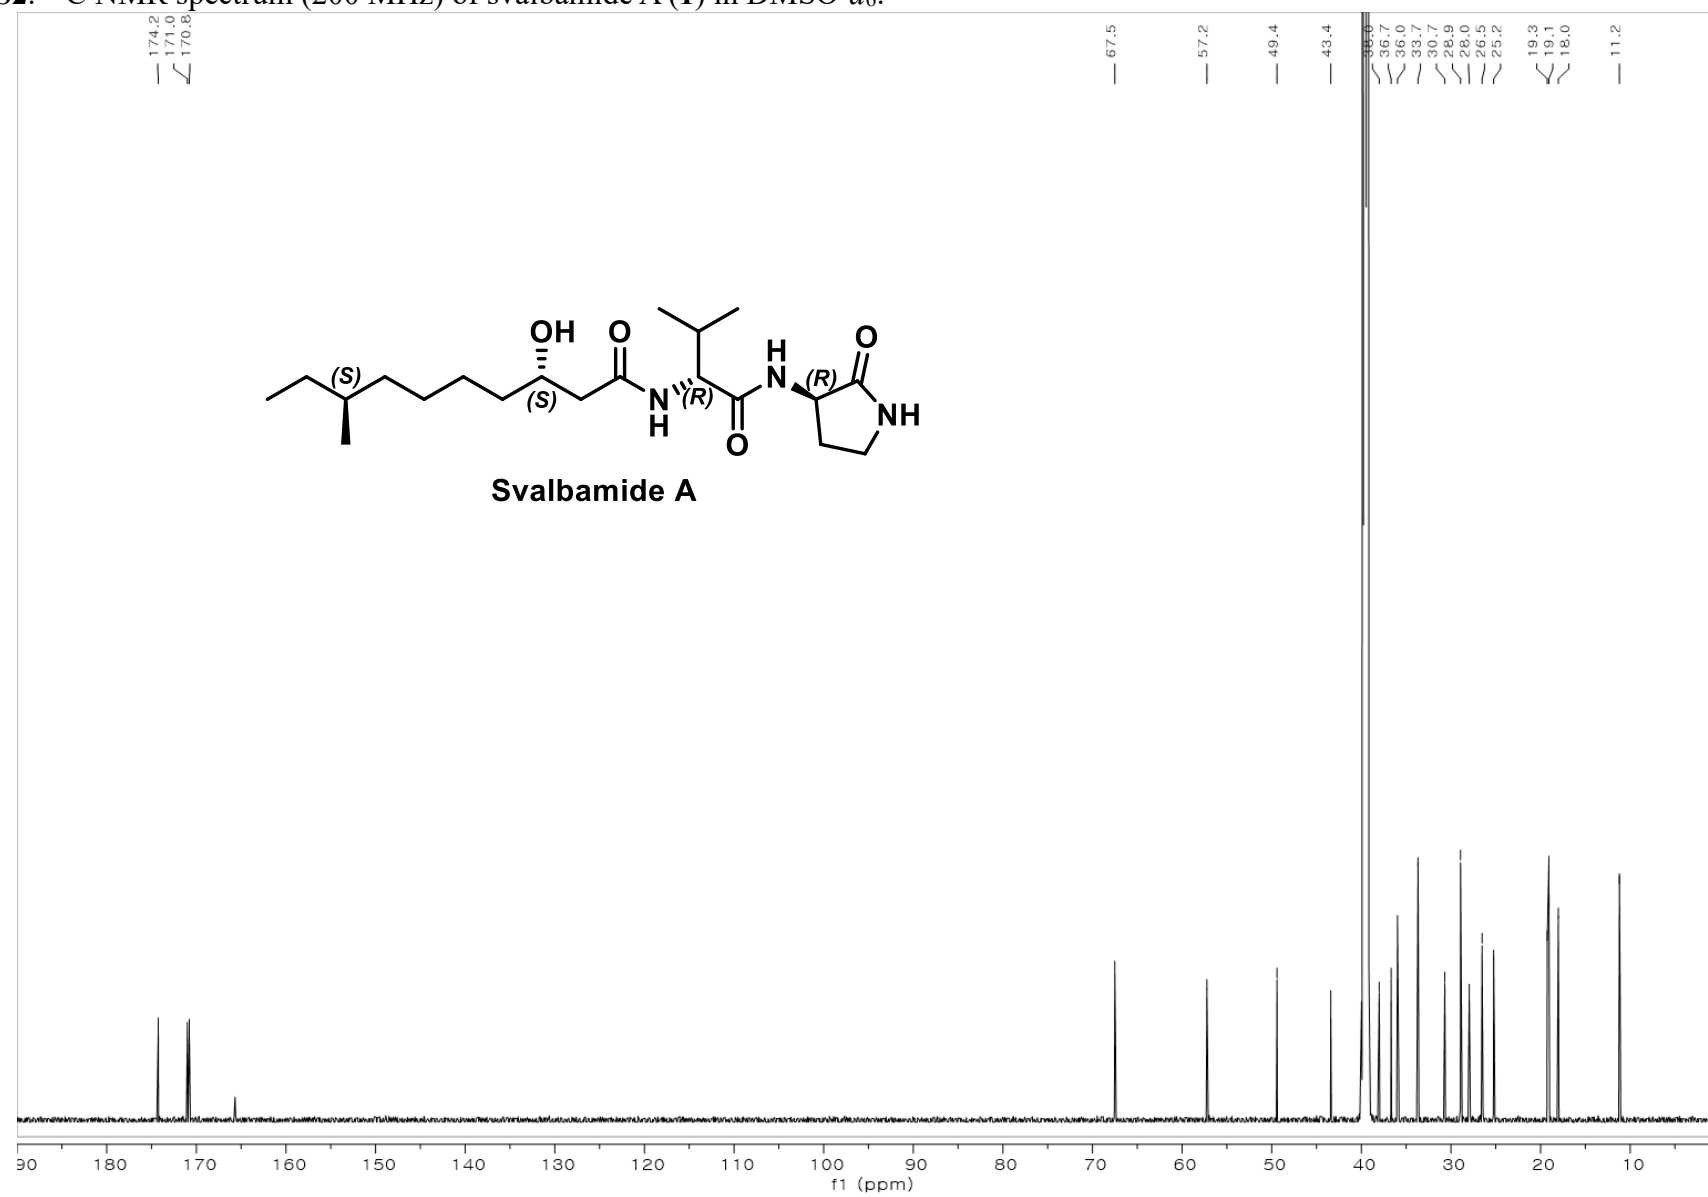

**Figure S3.** COSY NMR spectrum (800 MHz) of svalbamide A (**1**) in DMSO- $d_6$ .

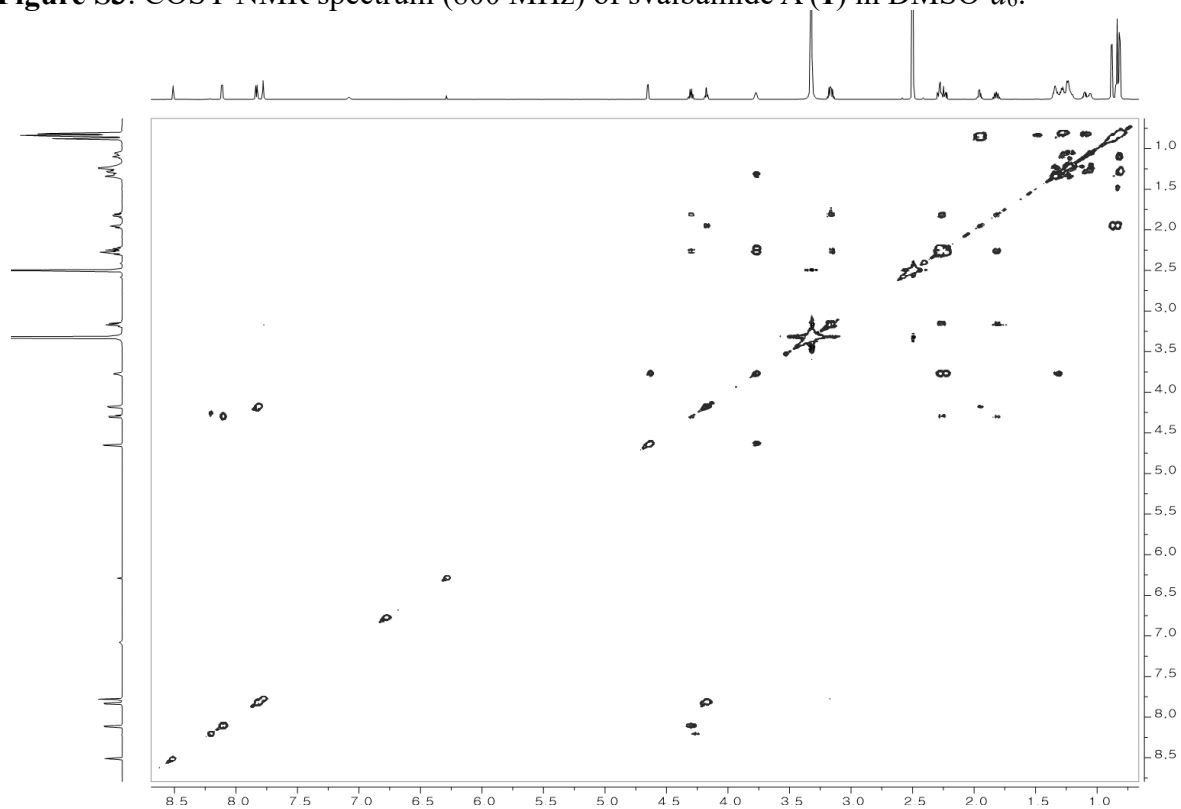

**Figure S4.** HSQC NMR spectrum (800 MHz) of svalbamide A (**1**) in DMSO- $d_6$ .

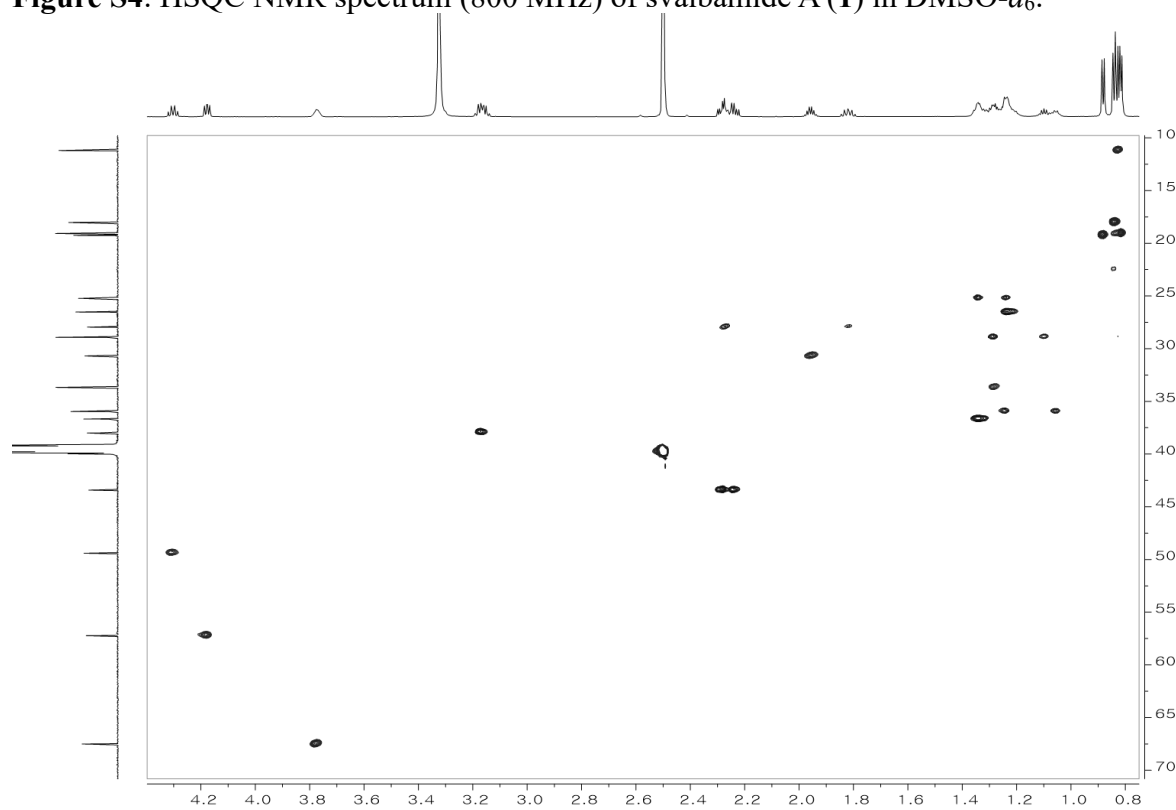

**Figure S5.** HMBC NMR spectrum (800 MHz) of svalbamide A (**1**) in DMSO- $d_6$ .

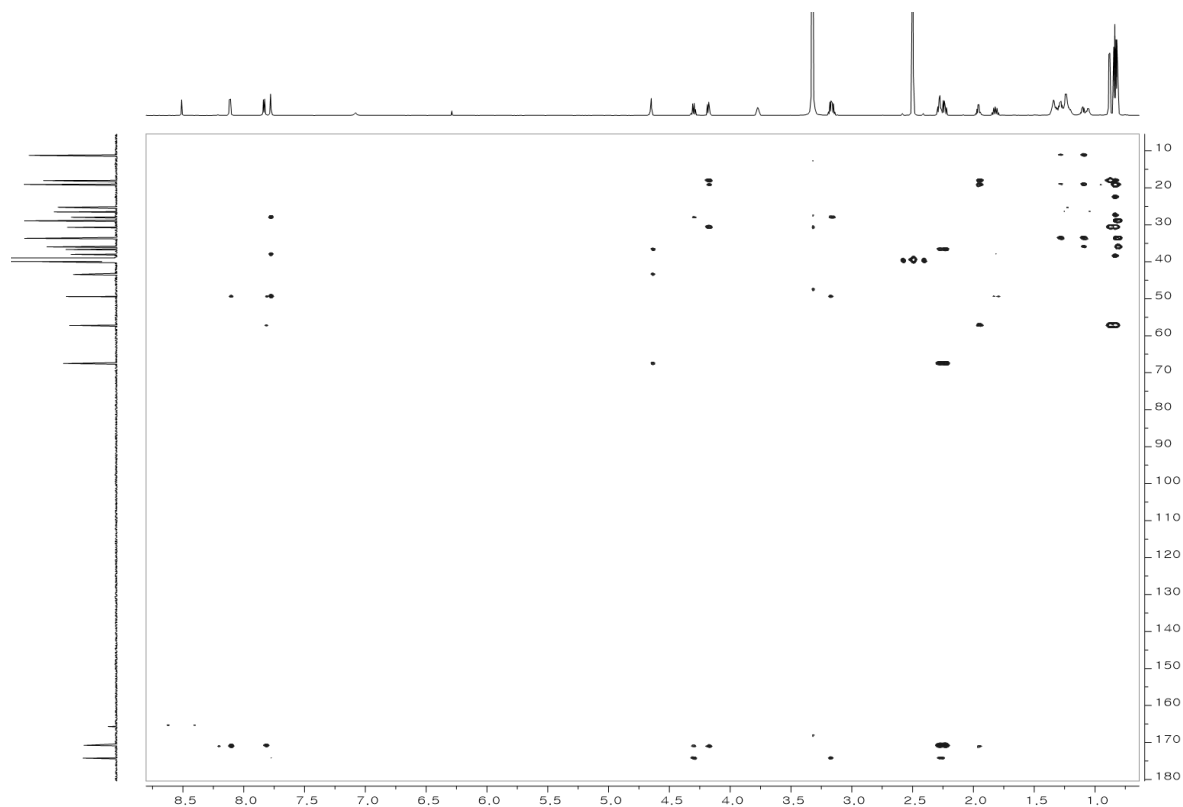

**Figure S6.** TOCSY NMR spectrum (800 MHz) of svalbamide A (**1**) in DMSO- $d_6$ .

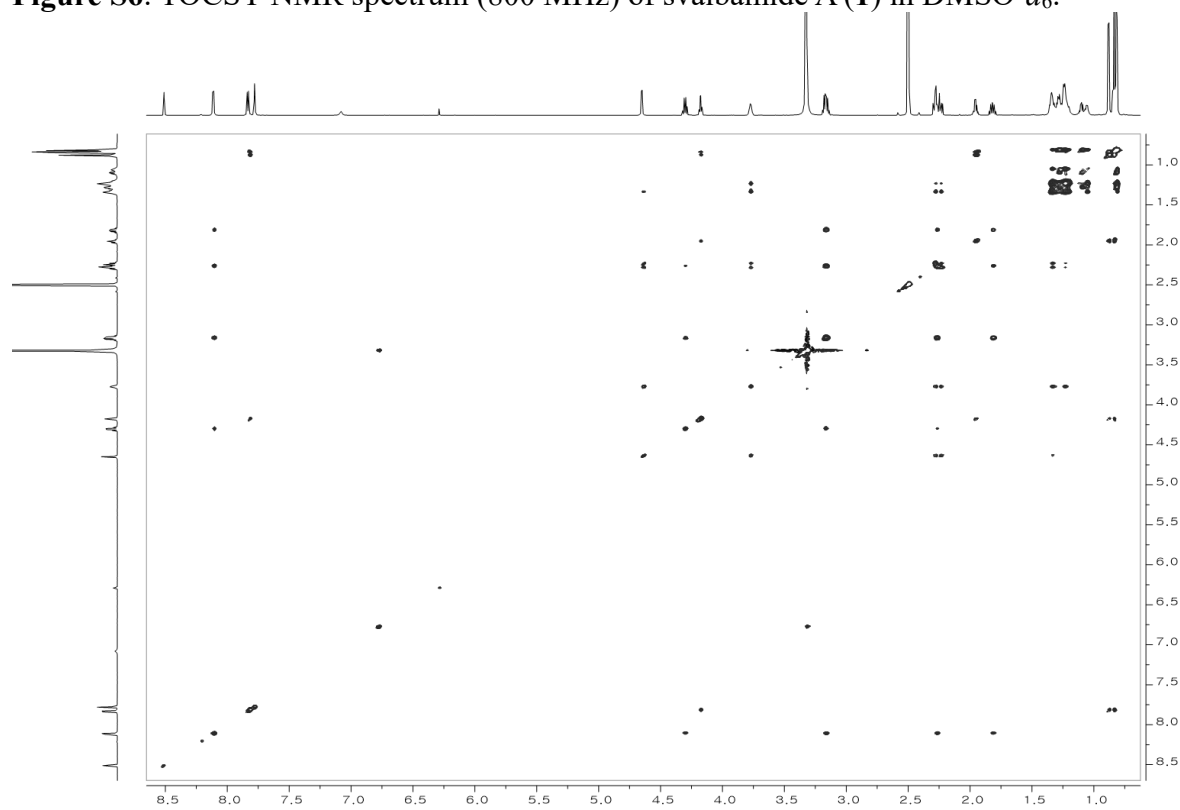

**Figure S7.**  $^1\text{H}$  NMR spectrum (800 MHz) of svalbamide B (**2**) in  $\text{DMSO}-d_6$ .

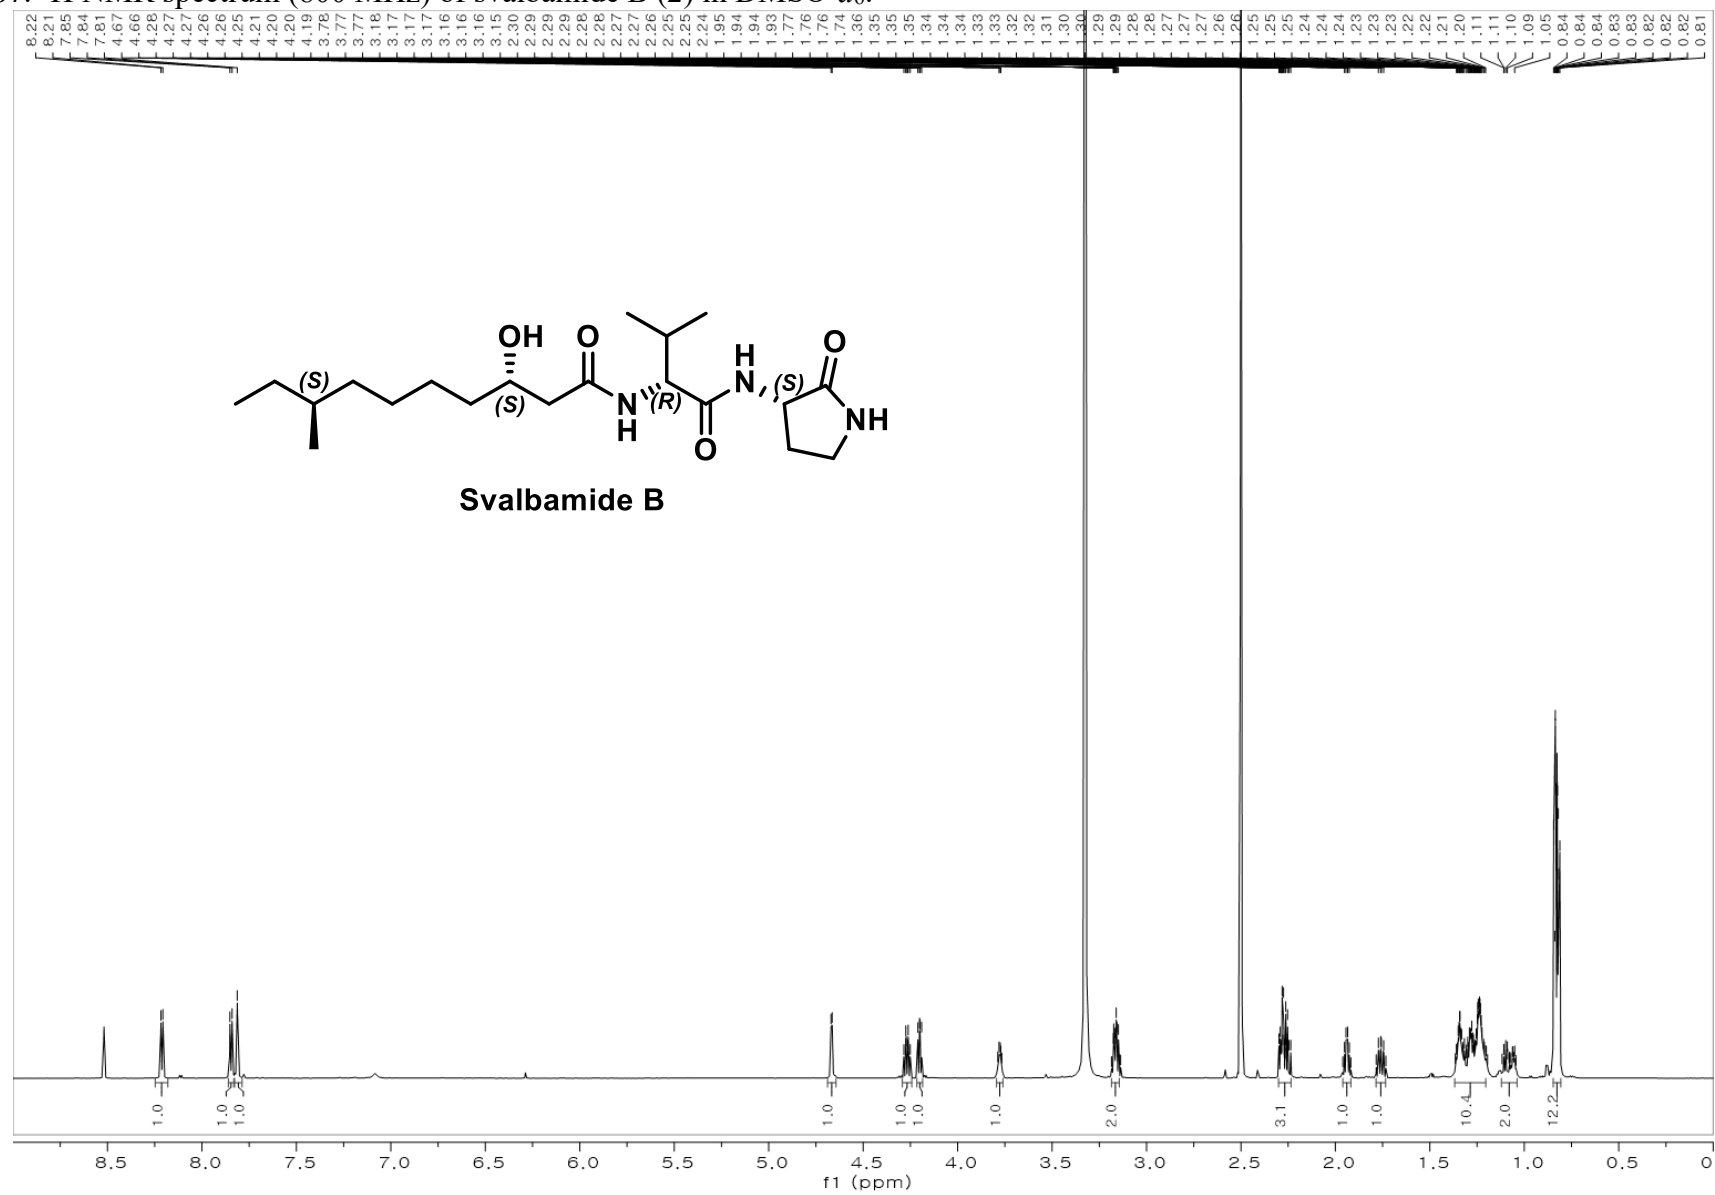

**Figure S8.**  $^{13}\text{C}$  NMR spectrum (200 MHz) of svalbamide B (**2**) in  $\text{DMSO}-d_6$ .

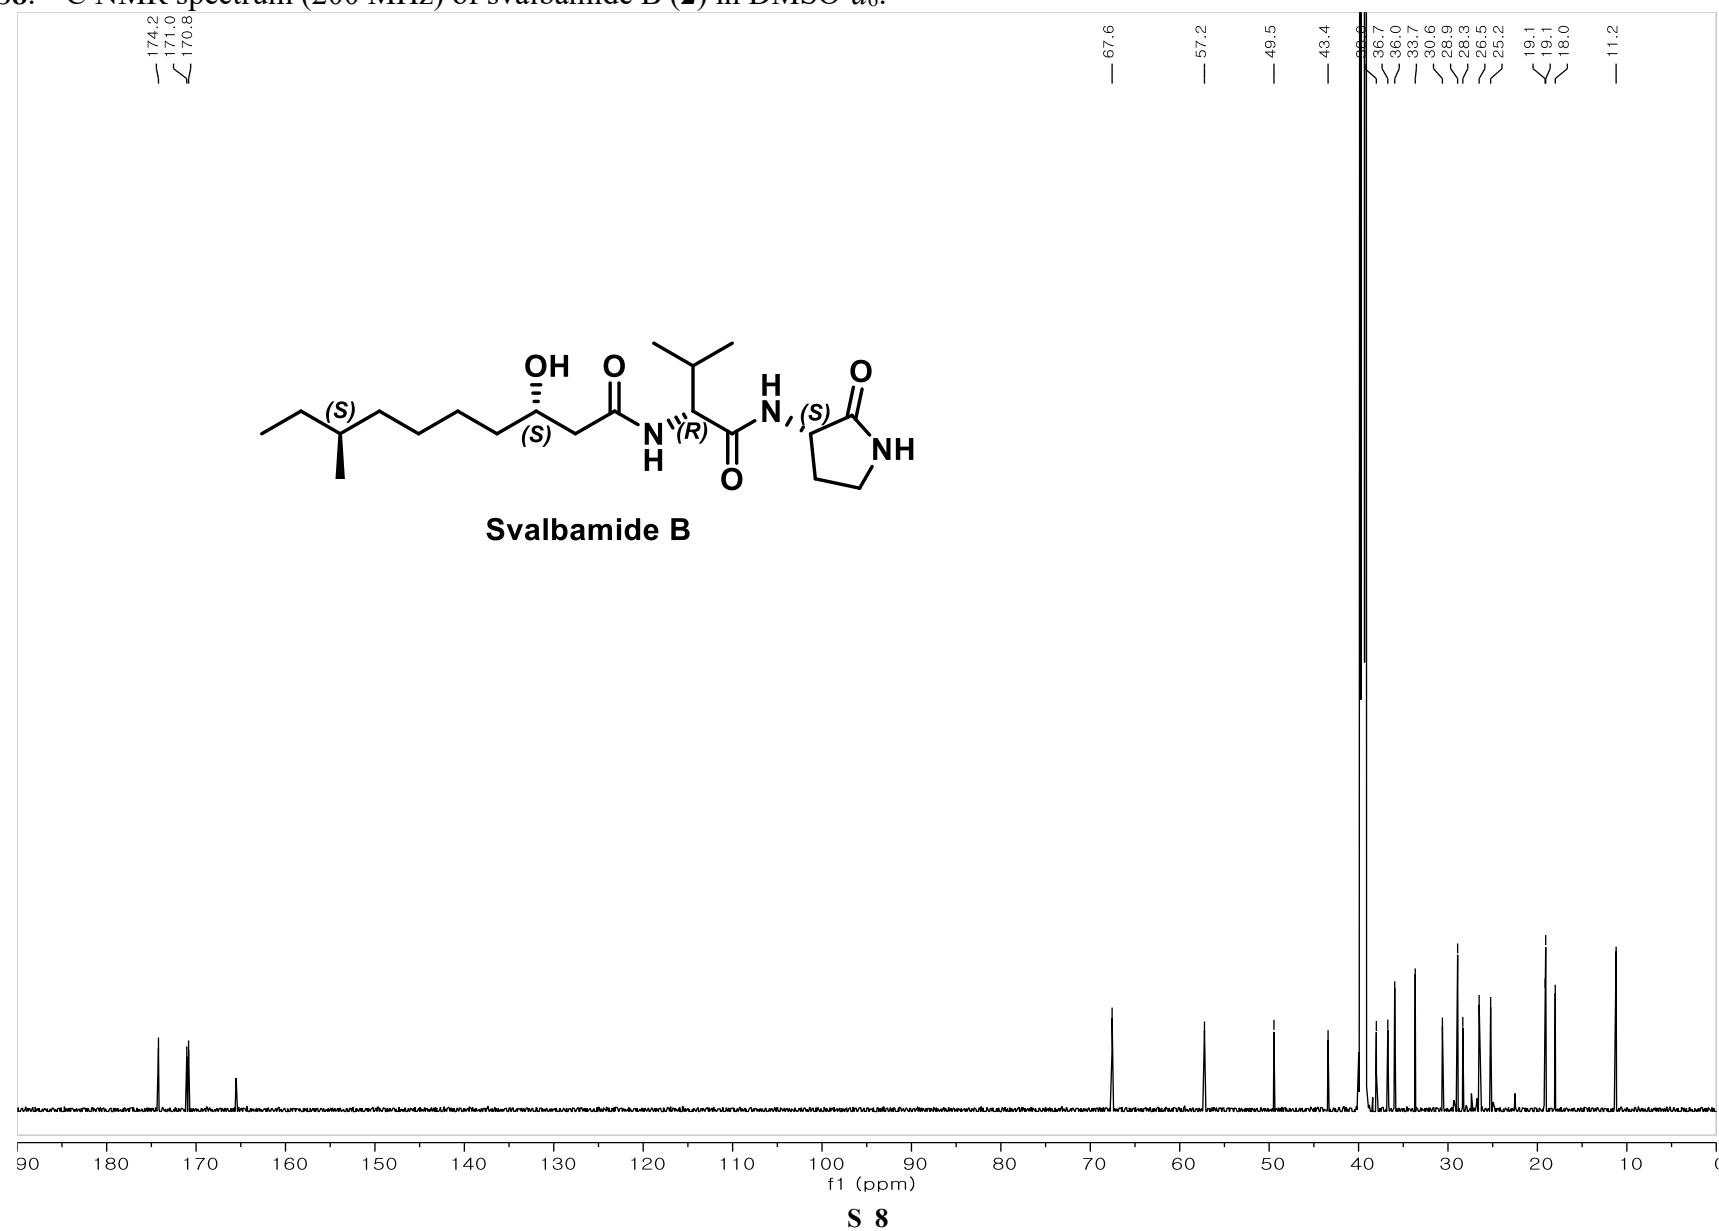

**Figure S9.** COSY NMR spectrum (800 MHz) of svalbamide B (**2**) in DMSO- $d_6$ .

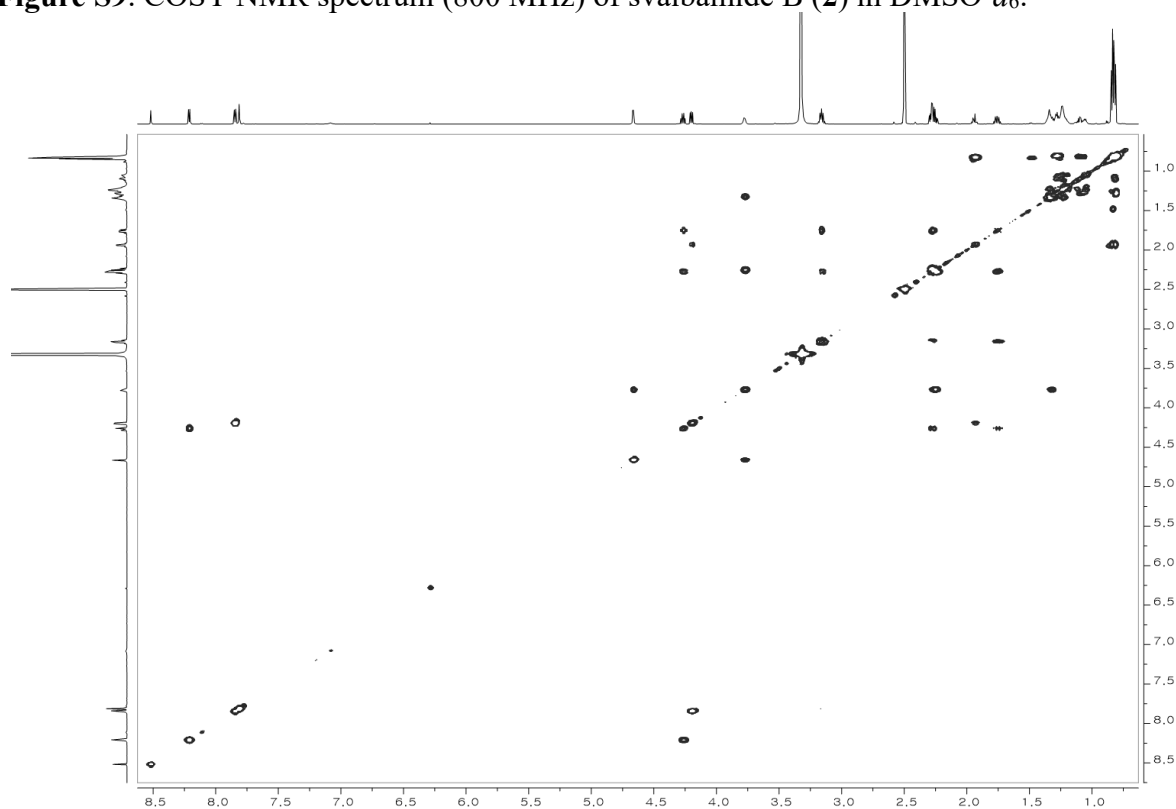

**Figure S10.** HSQC NMR spectrum (800 MHz) of svalbamide B (**2**) in DMSO- $d_6$ .

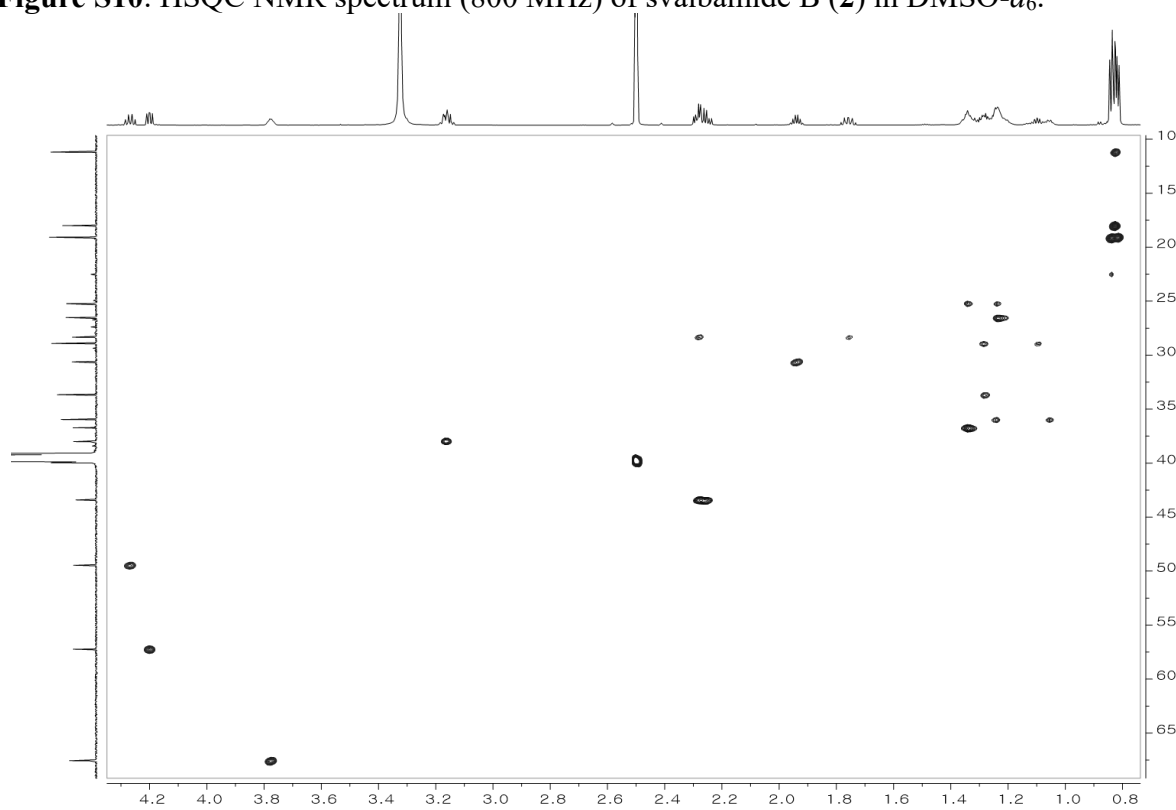

**Figure S11.** HMBC NMR spectrum (800 MHz) of svalbamide B (**2**) in DMSO- $d_6$ .

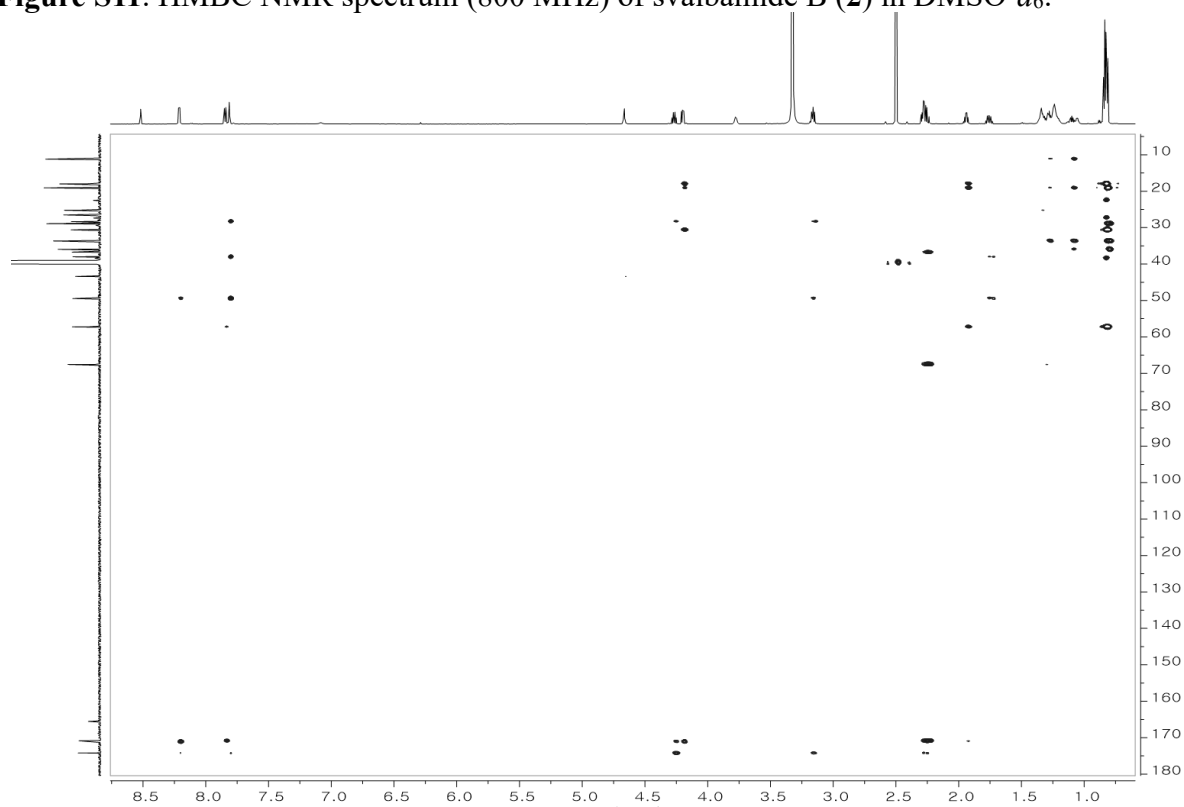

**Figure S12.** TOCSY NMR spectrum (800 MHz) of svalbamide B (**2**) in DMSO- $d_6$ .

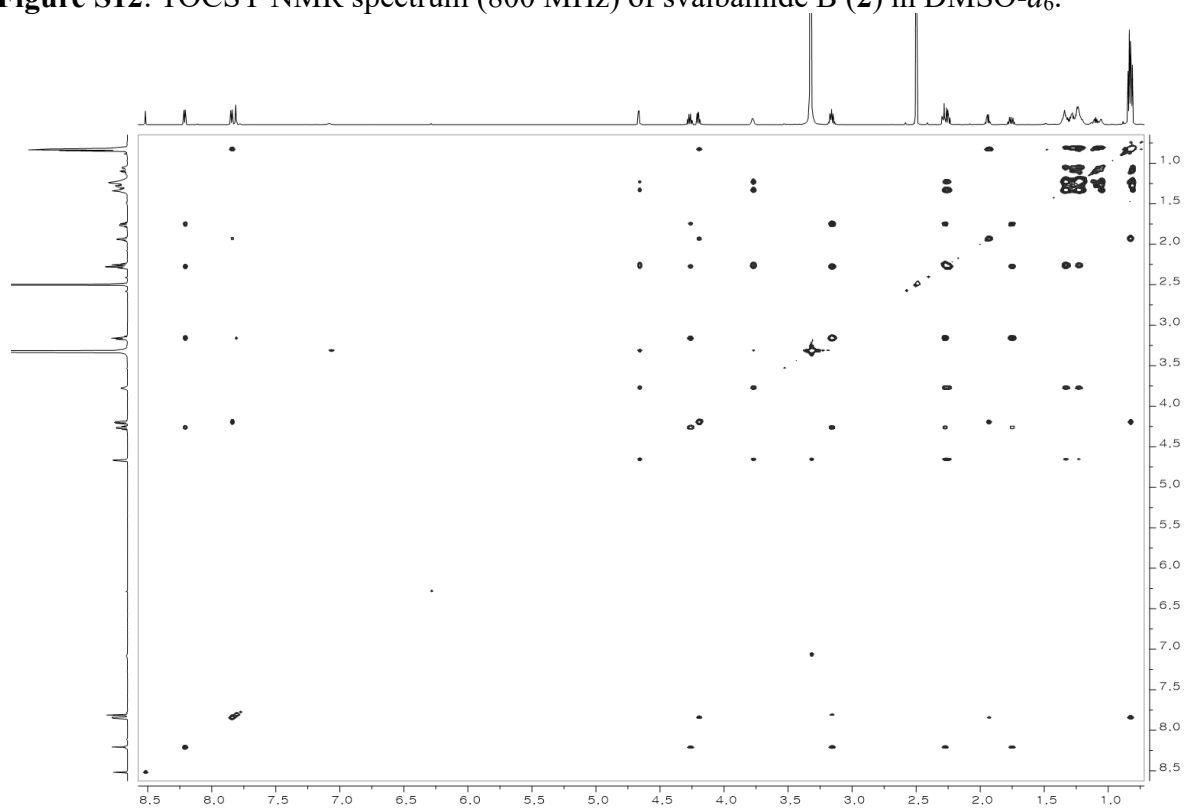

**Table S1.** LC/MS analysis of D- and L-FDAA derivatives of the amino acid-derived units in svalbamide A (**1**), svalbamide B (**2**), L-2,4-diamino butanoic acid (**3**), D-valine (**4**), and L-valine (**5**) authentic samples. Retention times (min) are notified.

|                  |                                                  |                               |
|------------------|--------------------------------------------------|-------------------------------|
| Svalbamide A (1) | Valine                                           | 2,4-diamino butanoic acid     |
| + D-FDAA         | 29.2                                             | 33.1                          |
| + L-FDAA         | 33.5                                             | 34.8                          |
| Elution order    | D → L                                            | D → L                         |
| Svalbamide (2)   | Valine                                           | 2,4-diamino butanoic acid     |
| + D-FDAA         | 29.7                                             | 35.2                          |
| + L-FDAA         | 33.0                                             | 33.1                          |
| Elution order    | D → L                                            | L → D                         |
|                  |                                                  |                               |
|                  | L-2,4-diamino butanoic acid authentic sample (3) |                               |
| + D-FDAA         | 35.3                                             |                               |
| + L-FDAA         | 33.6                                             |                               |
| Elution order    | L → D                                            |                               |
|                  |                                                  |                               |
|                  | D-Valine authentic sample (4)                    | L-Valine authentic sample (5) |
| + D-FDAA         | 28.9                                             | 33.0                          |
| + L-FDAA         | 33.0                                             | 28.9                          |
| Elution order    | D → L                                            | L → D                         |

**Figure S13.** The simulated models of four possible diastereomers (**a–d**) of svalbamide A (**1**) and the result of DP4 calculation.

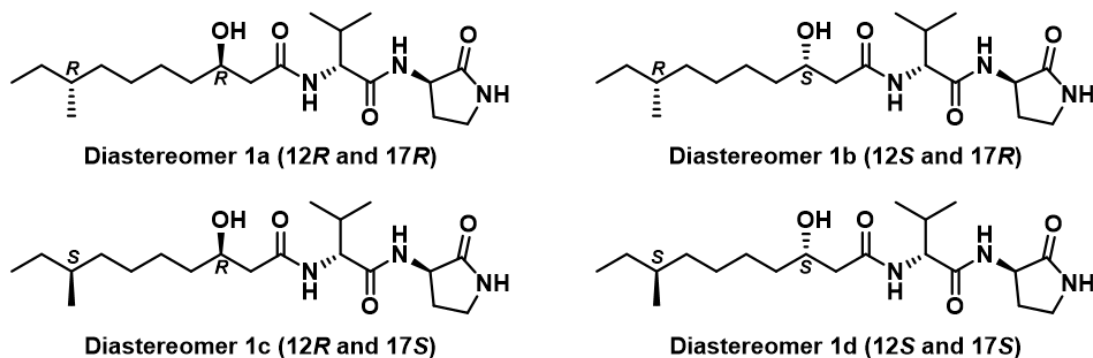

**DP4 Calculation result**

**Both carbon and proton data :** Diastereomer 1a (12*R* and 17*R*) – 0%  
 Diastereomer 1b (12*S* and 17*R*) – 4%  
 Diastereomer 1c (12*R* and 17*S*) – 0%  
 Diastereomer 1d (12*S* and 17*S*) – 96%

**Carbon only data :**

Diastereomer 1a (12*R* and 17*R*) – 0%  
 Diastereomer 1b (12*S* and 17*R*) – 57.9%  
 Diastereomer 1c (12*R* and 17*S*) – 1.7%  
 Diastereomer 1d (12*S* and 17*S*) – 40.3%

**Proton only data :**

Diastereomer 1a (12*R* and 17*R*) – 0%  
 Diastereomer 1b (12*S* and 17*R*) – 2.8%  
 Diastereomer 1c (12*R* and 17*S*) – 0%  
 Diastereomer 1d (12*S* and 17*S*) – 97.2%

**Table S2.** The major conformers of diastereomers (**a–d**) of svalbamide A (**1**), identified by conformational searches in MMFF94 force field using MacroModel.

| Conformers <sup>a</sup> | Boltzmann population (%) <sup>b</sup> |
|-------------------------|---------------------------------------|
| Diastereomer 1a_1       | 22.964                                |
| Diastereomer 1a_2       | 16.8                                  |
| Diastereomer 1a_3       | 15.144                                |
| Diastereomer 1a_4       | 12.335                                |
| Diastereomer 1a_5       | 7.154                                 |
| Diastereomer 1a_6       | 5.711                                 |
| Diastereomer 1a_7       | 4.117                                 |
| Diastereomer 1a_8       | 3.754                                 |
| Diastereomer 1a_9       | 3.301                                 |
| Diastereomer 1a_10      | 2.451                                 |
| Diastereomer 1a_11      | 1.605                                 |
| Diastereomer 1a_12      | 1.499                                 |
| Diastereomer 1a_13      | 0.981                                 |
| Diastereomer 1a_14      | 0.648                                 |
| Diastereomer 1a_15      | 0.57                                  |
| Diastereomer 1a_16      | 0.542                                 |
| Diastereomer 1a_17      | 0.424                                 |
| Diastereomer 1b_1       | 14.011                                |
| Diastereomer 1b_2       | 7.726                                 |
| Diastereomer 1b_3       | 6.735                                 |
| Diastereomer 1b_4       | 6.003                                 |
| Diastereomer 1b_5       | 5.089                                 |
| Diastereomer 1b_6       | 5.089                                 |
| Diastereomer 1b_7       | 4.988                                 |
| Diastereomer 1b_8       | 4.697                                 |
| Diastereomer 1b_9       | 2.963                                 |
| Diastereomer 1b_10      | 2.918                                 |
| Diastereomer 1b_11      | 2.898                                 |
| Diastereomer 1b_12      | 2.489                                 |
| Diastereomer 1b_13      | 2.407                                 |
| Diastereomer 1b_14      | 2.395                                 |
| Diastereomer 1b_15      | 2.23                                  |
| Diastereomer 1b_16      | 2.148                                 |
| Diastereomer 1b_17      | 1.875                                 |
| Diastereomer 1b_18      | 1.873                                 |
| Diastereomer 1b_19      | 1.87                                  |
| Diastereomer 1b_20      | 1.777                                 |
| Diastereomer 1b_21      | 1.617                                 |
| Diastereomer 1b_22      | 1.351                                 |
| Diastereomer 1b_23      | 1.186                                 |
| Diastereomer 1b_24      | 1.167                                 |
| Diastereomer 1b_25      | 1.164                                 |

|                    |        |
|--------------------|--------|
| Diastereomer 1b_26 | 1.131  |
| Diastereomer 1b_27 | 1.044  |
| Diastereomer 1b_28 | 0.963  |
| Diastereomer 1b_29 | 0.86   |
| Diastereomer 1b_30 | 0.856  |
| Diastereomer 1b_31 | 0.658  |
| Diastereomer 1b_32 | 0.541  |
| Diastereomer 1b_33 | 0.529  |
| Diastereomer 1b_34 | 0.526  |
| Diastereomer 1b_35 | 0.416  |
| Diastereomer 1b_36 | 0.39   |
| Diastereomer 1b_37 | 0.387  |
| Diastereomer 1b_38 | 0.365  |
| Diastereomer 1b_39 | 0.35   |
| Diastereomer 1b_40 | 0.35   |
| Diastereomer 1b_41 | 0.313  |
| Diastereomer 1b_42 | 0.3    |
| Diastereomer 1b_43 | 0.289  |
| Diastereomer 1b_44 | 0.276  |
| Diastereomer 1b_45 | 0.272  |
| Diastereomer 1b_46 | 0.271  |
| Diastereomer 1b_47 | 0.249  |
| <hr/>              |        |
| Diastereomer 1c_1  | 39.844 |
| Diastereomer 1c_2  | 23.166 |
| Diastereomer 1c_3  | 3.189  |
| Diastereomer 1c_4  | 3.049  |
| Diastereomer 1c_5  | 2.886  |
| Diastereomer 1c_6  | 2.877  |
| Diastereomer 1c_7  | 2.718  |
| Diastereomer 1c_8  | 2.493  |
| Diastereomer 1c_9  | 2.435  |
| Diastereomer 1c_10 | 2.298  |
| Diastereomer 1c_11 | 2.244  |
| Diastereomer 1c_12 | 2.227  |
| Diastereomer 1c_13 | 2.171  |
| Diastereomer 1c_14 | 1.65   |
| Diastereomer 1c_15 | 1.32   |
| Diastereomer 1c_16 | 1.082  |
| Diastereomer 1c_17 | 0.997  |
| Diastereomer 1c_18 | 0.931  |
| Diastereomer 1c_19 | 0.867  |
| Diastereomer 1c_20 | 0.797  |
| Diastereomer 1c_21 | 0.759  |
| <hr/>              |        |
| Diastereomer 1d_1  | 9.986  |
| Diastereomer 1d_2  | 9.897  |
| Diastereomer 1d_3  | 7.193  |

|                    |       |
|--------------------|-------|
| Diastereomer 1d_4  | 7.068 |
| Diastereomer 1d_5  | 6.824 |
| Diastereomer 1d_6  | 5.628 |
| Diastereomer 1d_7  | 3.856 |
| Diastereomer 1d_8  | 3.29  |
| Diastereomer 1d_9  | 3.212 |
| Diastereomer 1d_10 | 1.884 |
| Diastereomer 1d_11 | 1.867 |
| Diastereomer 1d_12 | 1.854 |
| Diastereomer 1d_13 | 1.747 |
| Diastereomer 1d_14 | 1.712 |
| Diastereomer 1d_15 | 1.668 |
| Diastereomer 1d_16 | 1.57  |
| Diastereomer 1d_17 | 1.511 |
| Diastereomer 1d_18 | 1.343 |
| Diastereomer 1d_19 | 1.136 |
| Diastereomer 1d_20 | 1.133 |
| Diastereomer 1d_21 | 1.108 |
| Diastereomer 1d_22 | 1.07  |
| Diastereomer 1d_23 | 1.039 |
| Diastereomer 1d_24 | 0.9   |
| Diastereomer 1d_25 | 0.861 |
| Diastereomer 1d_26 | 0.851 |
| Diastereomer 1d_27 | 0.843 |
| Diastereomer 1d_28 | 0.808 |
| Diastereomer 1d_29 | 0.805 |
| Diastereomer 1d_30 | 0.797 |
| Diastereomer 1d_31 | 0.773 |
| Diastereomer 1d_32 | 0.756 |
| Diastereomer 1d_33 | 0.732 |
| Diastereomer 1d_34 | 0.723 |
| Diastereomer 1d_35 | 0.658 |
| Diastereomer 1d_36 | 0.651 |
| Diastereomer 1d_37 | 0.63  |
| Diastereomer 1d_38 | 0.613 |
| Diastereomer 1d_39 | 0.58  |
| Diastereomer 1d_40 | 0.576 |
| Diastereomer 1d_41 | 0.569 |
| Diastereomer 1d_42 | 0.503 |
| Diastereomer 1d_43 | 0.497 |
| Diastereomer 1d_44 | 0.48  |
| Diastereomer 1d_45 | 0.452 |
| Diastereomer 1d_46 | 0.429 |
| Diastereomer 1d_47 | 0.388 |
| Diastereomer 1d_48 | 0.362 |
| Diastereomer 1d_49 | 0.355 |

|                    |       |
|--------------------|-------|
| Diastereomer 1d_50 | 0.331 |
| Diastereomer 1d_51 | 0.303 |
| Diastereomer 1d_52 | 0.301 |
| Diastereomer 1d_53 | 0.297 |
| Diastereomer 1d_54 | 0.297 |
| Diastereomer 1d_55 | 0.276 |
| Diastereomer 1d_56 | 0.274 |
| Diastereomer 1d_57 | 0.269 |
| Diastereomer 1d_58 | 0.266 |
| Diastereomer 1d_59 | 0.262 |
| Diastereomer 1d_60 | 0.246 |
| Diastereomer 1d_61 | 0.243 |
| Diastereomer 1d_62 | 0.242 |
| Diastereomer 1d_63 | 0.237 |
| Diastereomer 1d_64 | 0.221 |
| Diastereomer 1d_65 | 0.212 |
| Diastereomer 1d_66 | 0.207 |
| Diastereomer 1d_67 | 0.202 |
| Diastereomer 1d_68 | 0.2   |
| Diastereomer 1d_69 | 0.191 |
| Diastereomer 1d_70 | 0.185 |
| Diastereomer 1d_71 | 0.184 |
| Diastereomer 1d_72 | 0.183 |
| Diastereomer 1d_73 | 0.181 |

---

**Table S3.** Experimental (Exp.) and calculated (Cal.) chemical shift values (CS,  $\delta$ ) of diastereomers (a–d) of **1** and svalbamide A (**1**).

| No.  | Exp. CS of Svalbamide A (1) | Cal CS of diastereomer 1a | Cal CS of diastereomer 1b | Cal CS of diastereomer 1c | Cal CS of diastereomer 1d |
|------|-----------------------------|---------------------------|---------------------------|---------------------------|---------------------------|
| C-1  | 19.3                        | 27.36                     | 27.52                     | 26.97                     | 27.08                     |
| C-2  | 30.7                        | 33.9                      | 33.75                     | 34.55                     | 34.37                     |
| C-3  | 18.0                        | 23.22                     | 23.13                     | 23.87                     | 23.37                     |
| C-4  | 57.2                        | 65.25                     | 65.13                     | 64.87                     | 64.61                     |
| C-6  | 171.0                       | 170.57                    | 170.91                    | 170.26                    | 170.80                    |
| C-9  | 49.4                        | 56.07                     | 56.00                     | 56.07                     | 55.92                     |
| C-10 | 170.8                       | 165.72                    | 167.90                    | 165.36                    | 167.73                    |
| C-11 | 28.0                        | 37.83                     | 37.42                     | 37.92                     | 37.01                     |
| C-12 | 38.0                        | 44.71                     | 44.49                     | 44.45                     | 44.70                     |
| C-14 | 174.2                       | 172.4                     | 172.20                    | 172.63                    | 172.25                    |
| C-17 | 43.4                        | 42.37                     | 44.60                     | 42.98                     | 44.66                     |
| C-18 | 67.5                        | 75.28                     | 74.49                     | 75.27                     | 74.74                     |
| C-20 | 36.7                        | 40.7                      | 44.91                     | 42.50                     | 45.24                     |
| C-21 | 25.2                        | 33.09                     | 32.63                     | 32.63                     | 33.41                     |
| C-22 | 26.5                        | 32.84                     | 33.57                     | 34.79                     | 33.04                     |
| C-23 | 36.0                        | 40.48                     | 42.63                     | 43.02                     | 41.47                     |
| C-24 | 33.7                        | 39.3                      | 40.40                     | 39.36                     | 39.90                     |
| C-25 | 19.1                        | 27.75                     | 26.71                     | 28.03                     | 27.08                     |
| C-26 | 28.9                        | 35.31                     | 37.39                     | 35.55                     | 35.09                     |
| C-27 | 11.2                        | 18.67                     | 19.78                     | 20.14                     | 17.98                     |
| H-28 | 0.88                        | 0.96                      | 0.96                      | 0.95                      | 0.96                      |
| H-29 | 0.88                        | 0.97                      | 1.01                      | 0.92                      | 1.04                      |
| H-30 | 0.88                        | 0.89                      | 0.88                      | 0.93                      | 0.9                       |
| H-31 | 1.96                        | 2.23                      | 2.23                      | 2.14                      | 2.17                      |
| H-32 | 0.84                        | 1.18                      | 1.15                      | 1.2                       | 1.11                      |
| H-33 | 0.84                        | 0.8                       | 0.8                       | 0.83                      | 0.81                      |
| H-34 | 0.84                        | 0.6                       | 0.6                       | 0.67                      | 0.65                      |
| H-35 | 4.18                        | 3.72                      | 3.64                      | 3.72                      | 3.59                      |
| H-36 | 7.83                        | 3.55                      | 3.43                      | 3.55                      | 3.4                       |
| H-37 | 8.10                        | 6.84                      | 6.67                      | 6.91                      | 6.7                       |
| H-38 | 4.30                        | 3.7                       | 3.62                      | 3.65                      | 3.56                      |
| H-39 | 2.26                        | 2.39                      | 2.48                      | 2.44                      | 2.44                      |
| H-40 | 1.82                        | 1.5                       | 1.52                      | 1.55                      | 1.56                      |
| H-41 | 3.16                        | 2.83                      | 2.84                      | 2.82                      | 2.85                      |
| H-42 | 3.16                        | 3.04                      | 3.02                      | 3                         | 2.98                      |
| H-43 | 7.78                        | 3.29                      | 3.3                       | 3.36                      | 3.3                       |
| H-44 | 2.29                        | 2.47                      | 2.07                      | 2.48                      | 2.06                      |
| H-45 | 2.23                        | 1.66                      | 1.61                      | 1.66                      | 1.58                      |
| H-46 | 3.78                        | 3.7                       | 3.78                      | 3.74                      | 3.75                      |
| H-47 | 4.65                        | 2.92                      | 3.19                      | 2.79                      | 3.16                      |
| H-48 | 1.33                        | 1.11                      | 1.29                      | 1.21                      | 1.31                      |
| H-49 | 1.33                        | 1.51                      | 1.27                      | 1.47                      | 1.24                      |
| H-50 | 1.34                        | 1.36                      | 1.33                      | 1.43                      | 1.28                      |
| H-51 | 1.24                        | 1.25                      | 1.23                      | 0.98                      | 1.27                      |
| H-52 | 1.23                        | 1.17                      | 1.37                      | 1.17                      | 1.15                      |
| H-53 | 1.23                        | 1.28                      | 1.21                      | 1.23                      | 1.27                      |

|      |      |      |      |      |      |
|------|------|------|------|------|------|
| H-54 | 1.25 | 1.4  | 1.28 | 1.13 | 1.24 |
| H-55 | 1.05 | 0.99 | 1.03 | 1.28 | 1.27 |
| H-56 | 1.28 | 1.43 | 1.26 | 1.31 | 1.39 |
| H-57 | 0.81 | 0.92 | 1.01 | 1.03 | 0.96 |
| H-58 | 0.81 | 0.84 | 1.04 | 1.02 | 0.99 |
| H-59 | 0.81 | 0.77 | 0.51 | 0.52 | 0.82 |
| H-60 | 1.09 | 1.24 | 1.21 | 0.93 | 1.31 |
| H-61 | 1.28 | 1.16 | 1.15 | 1.33 | 1.3  |
| H-62 | 0.82 | 0.85 | 0.93 | 0.85 | 0.88 |
| H-63 | 0.82 | 0.91 | 0.85 | 0.95 | 0.85 |
| H-64 | 0.82 | 0.75 | 0.86 | 0.92 | 0.8  |
